# Supplementary material
Source: Springer Nature journal article supplement (https://www.springermedizin.de/resource/supplementary/12958_2010_735_MOESM4_ESM.pdf/9568368)

**Effective induction of acrosome  
reaction (%)**

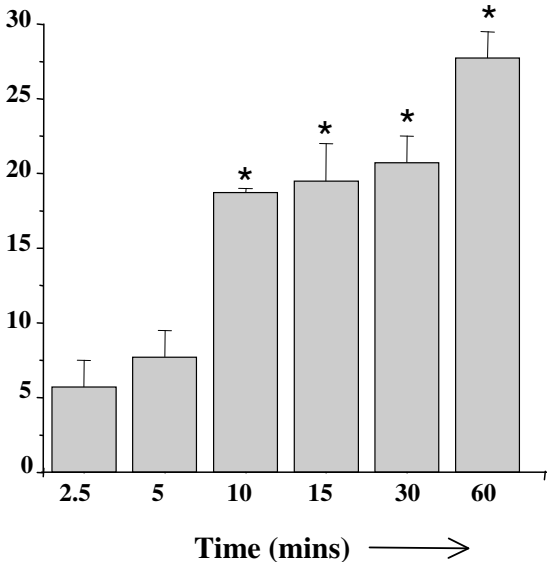

Supplement: MOESM4 [file 9568368]
